# Supplementary material for: Enterococcus faecalis-Induced Biochemical Transformation during Fermentation of Underutilized Solenostemon monostachyus Leaves
Source: MDPI journal article supplement (doi:10.3390/fermentation9010033), 2022-12-30
Supplement: s1 [file s1]

Archive with 1 entries (1 files):
- fermentation-2033115-supplementary.PDF
