# Supplementary material for: Enterococcus faecalis-Induced Biochemical Transformation during Fermentation of Underutilized Solenostemon monostachyus Leaves
Source: MDPI journal article supplement (doi:10.3390/fermentation9010033), 2022-12-30
Supplement: s1 [file s1 › fermentation-2033115-supplementary.PDF]

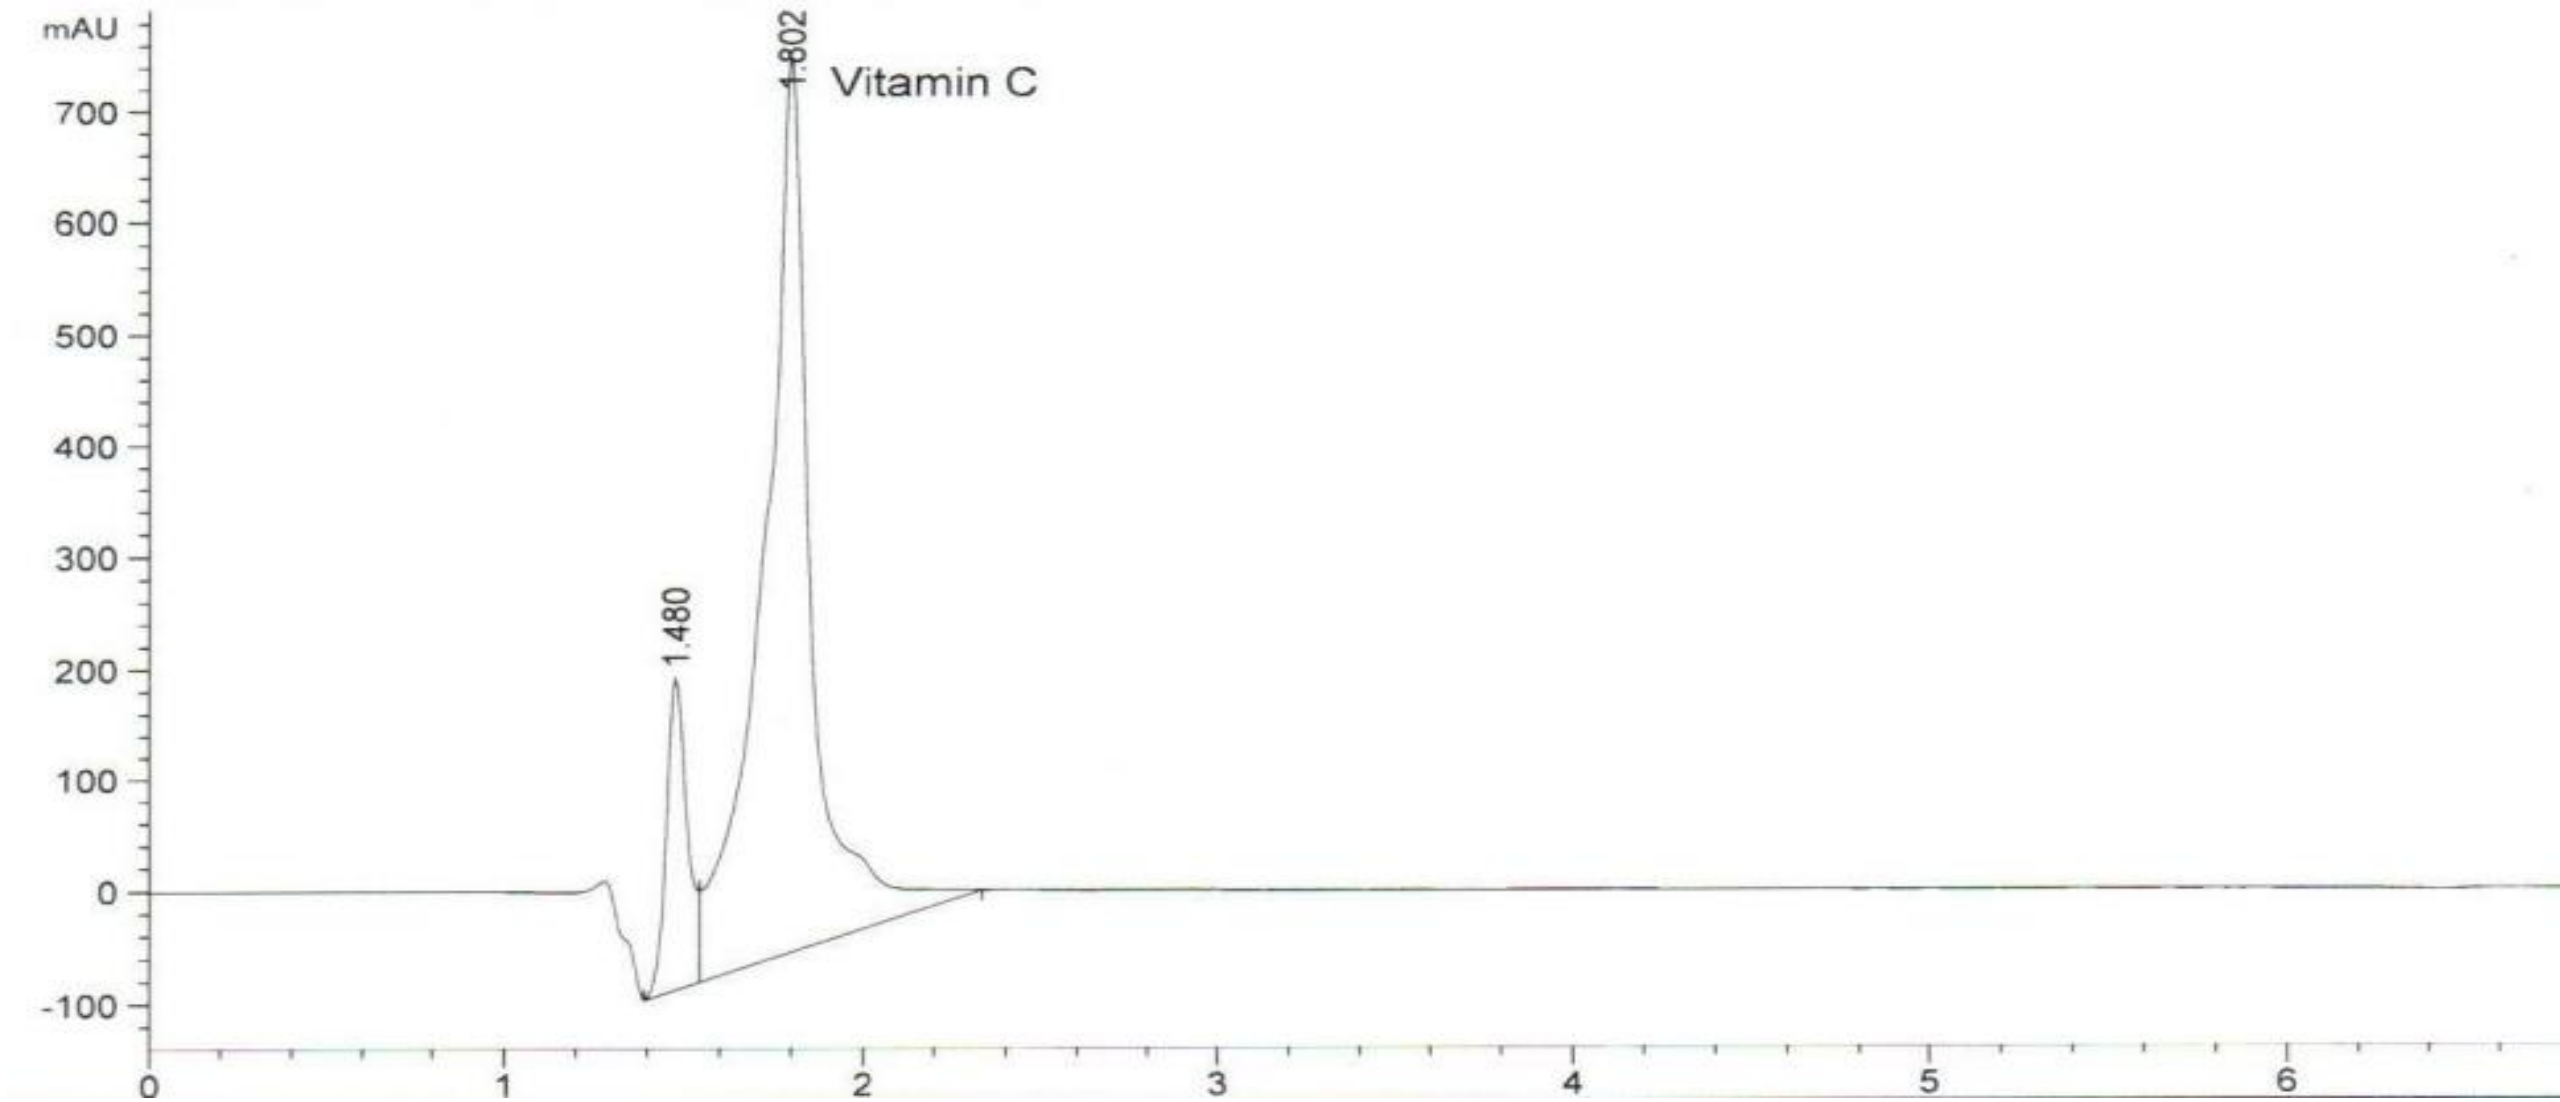

Figure S1: Chromatogram for the HPLC vitamin C standard analysis

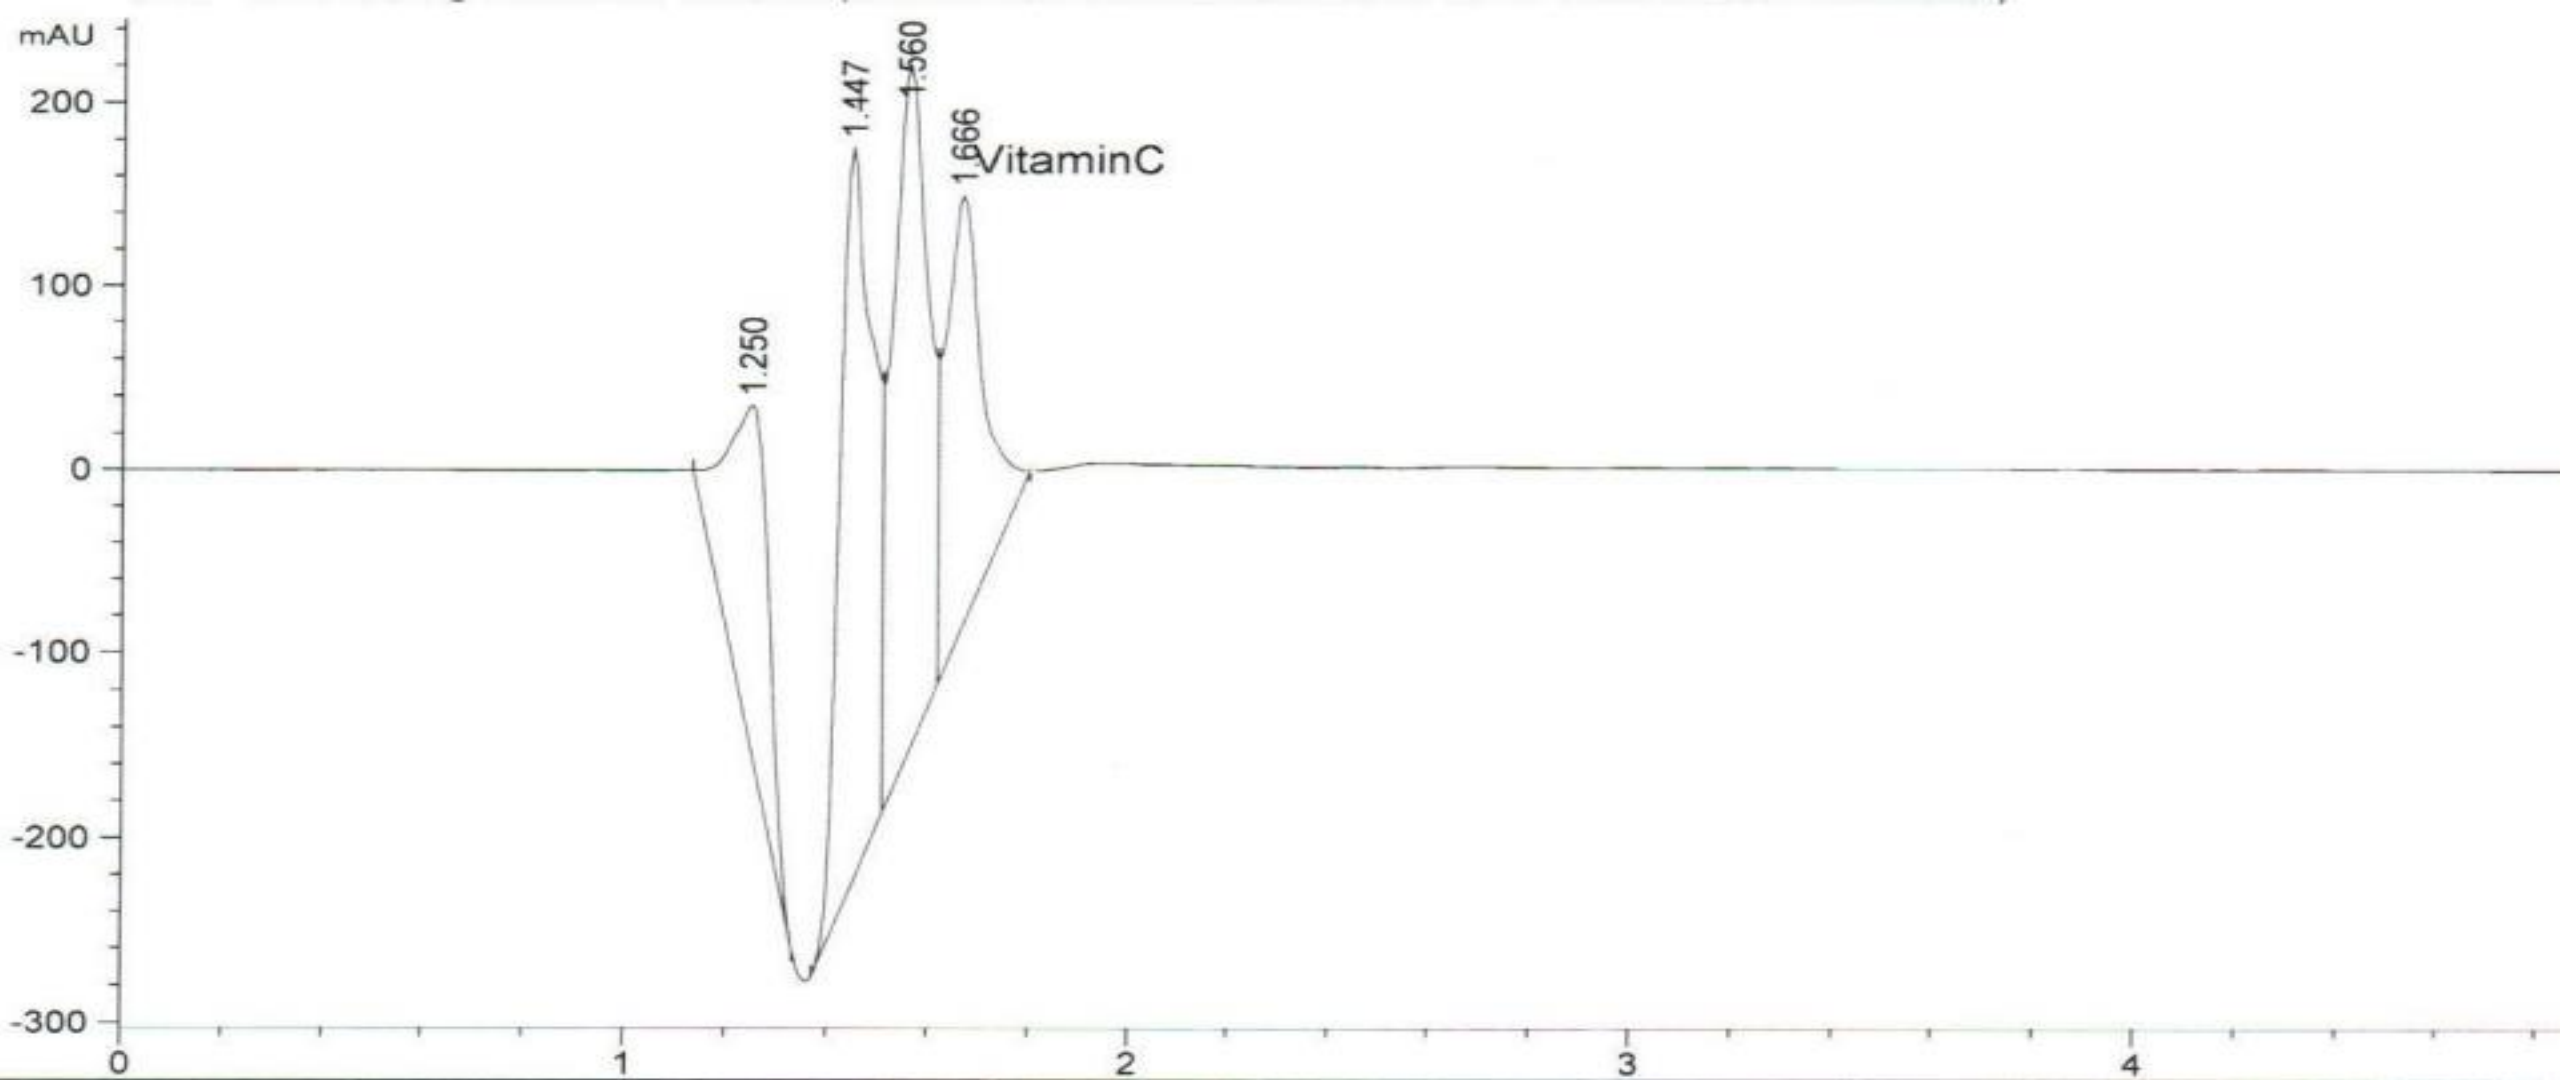

Figure S2: Chromatogram for the HPLC vitamin C analysis of the aqueous extract of unfermented *S. monostachyus* leaves

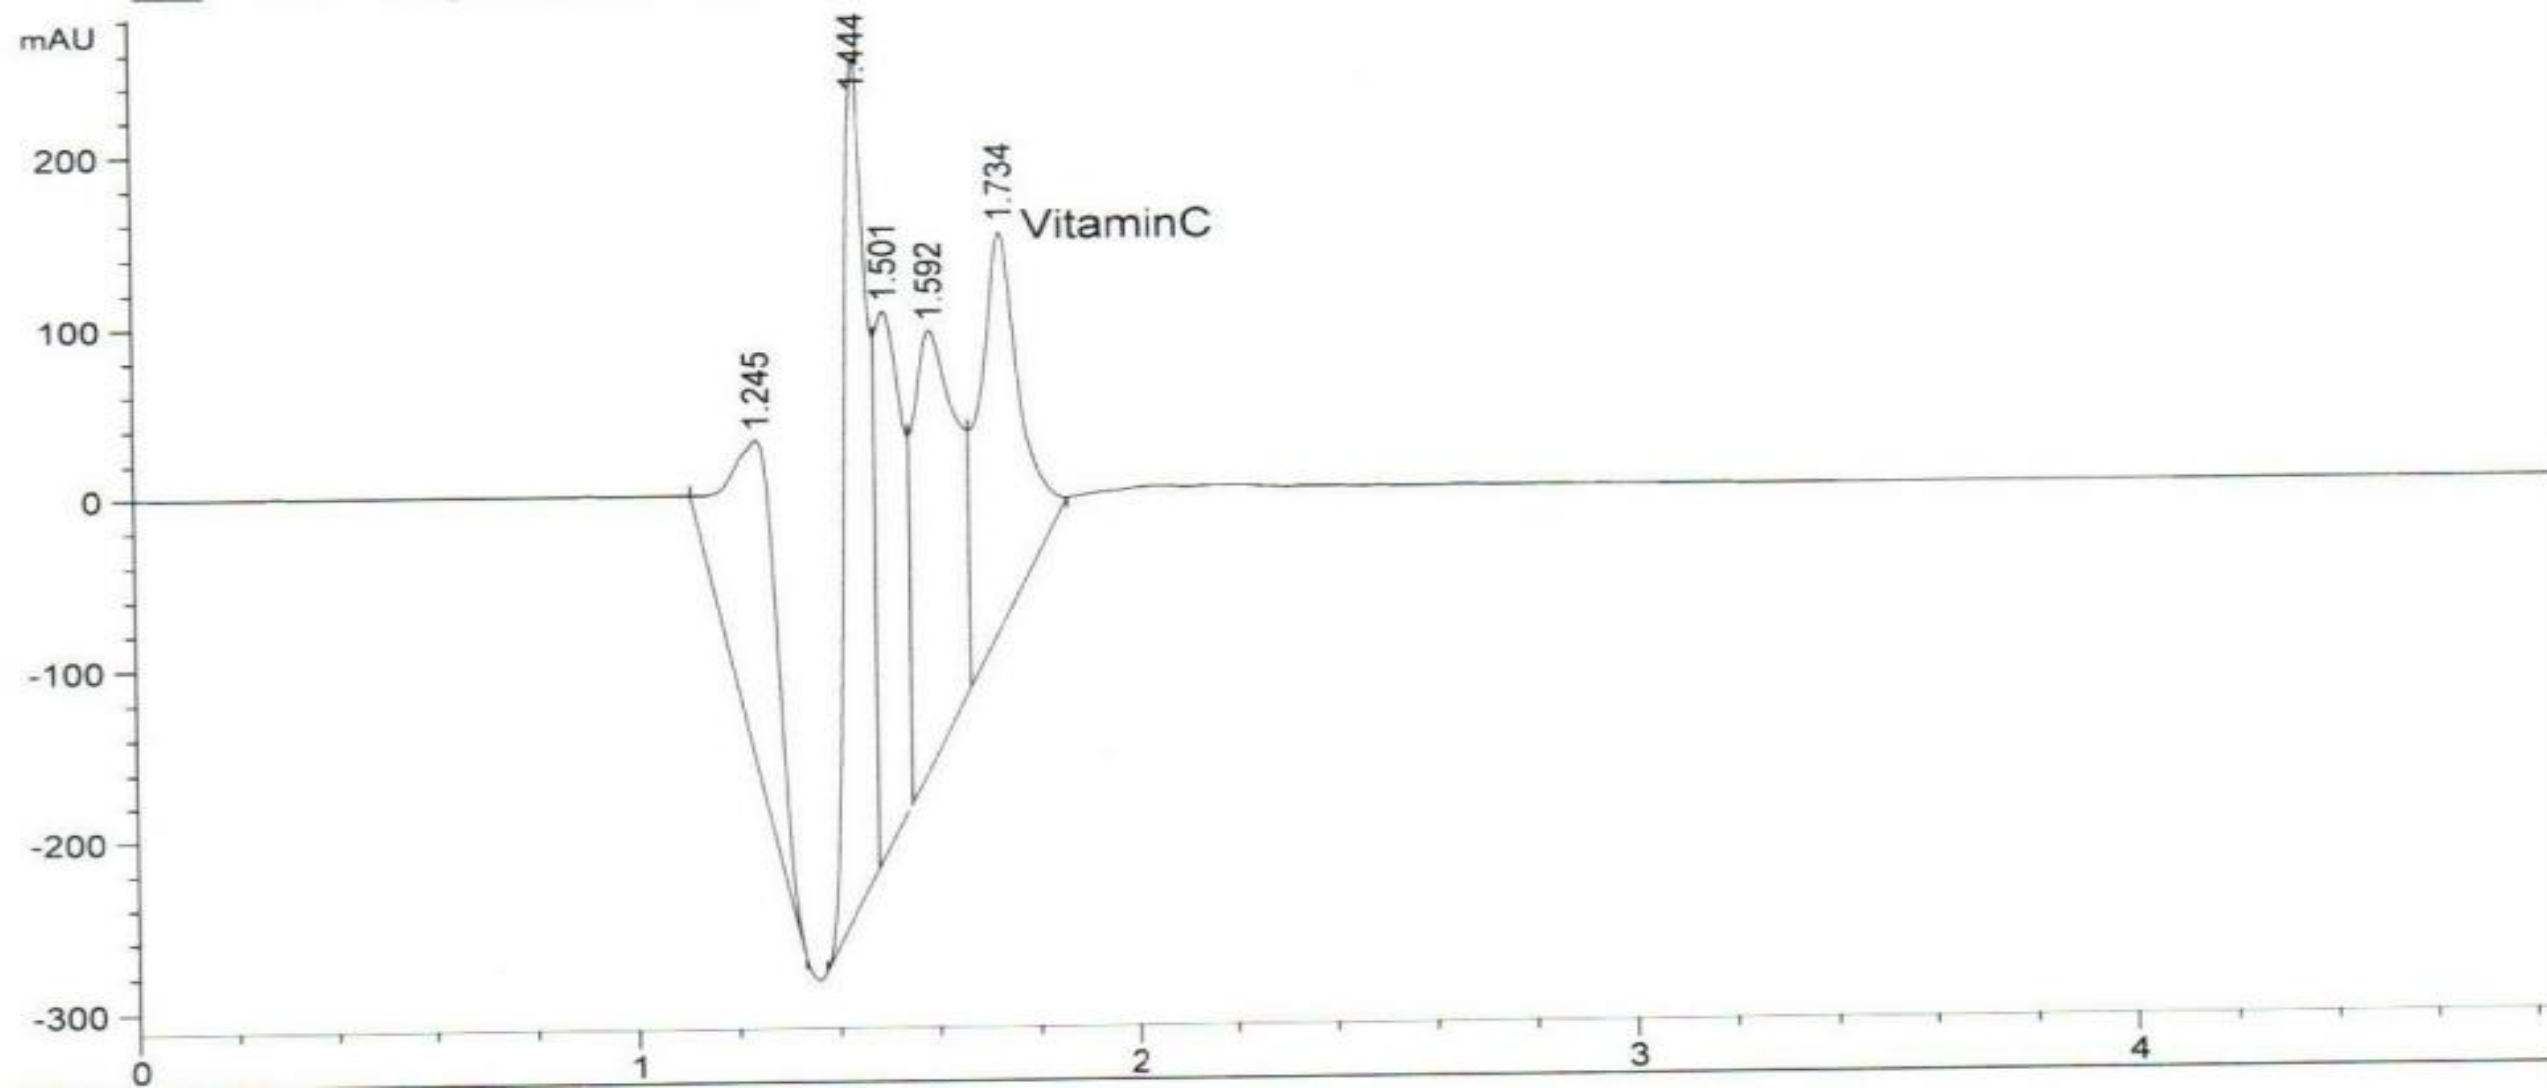

Figure S3: Chromatogram for the HPLC vitamin C analysis of the aqueous extract of 5-days fermented *S. monostachyus* leaves

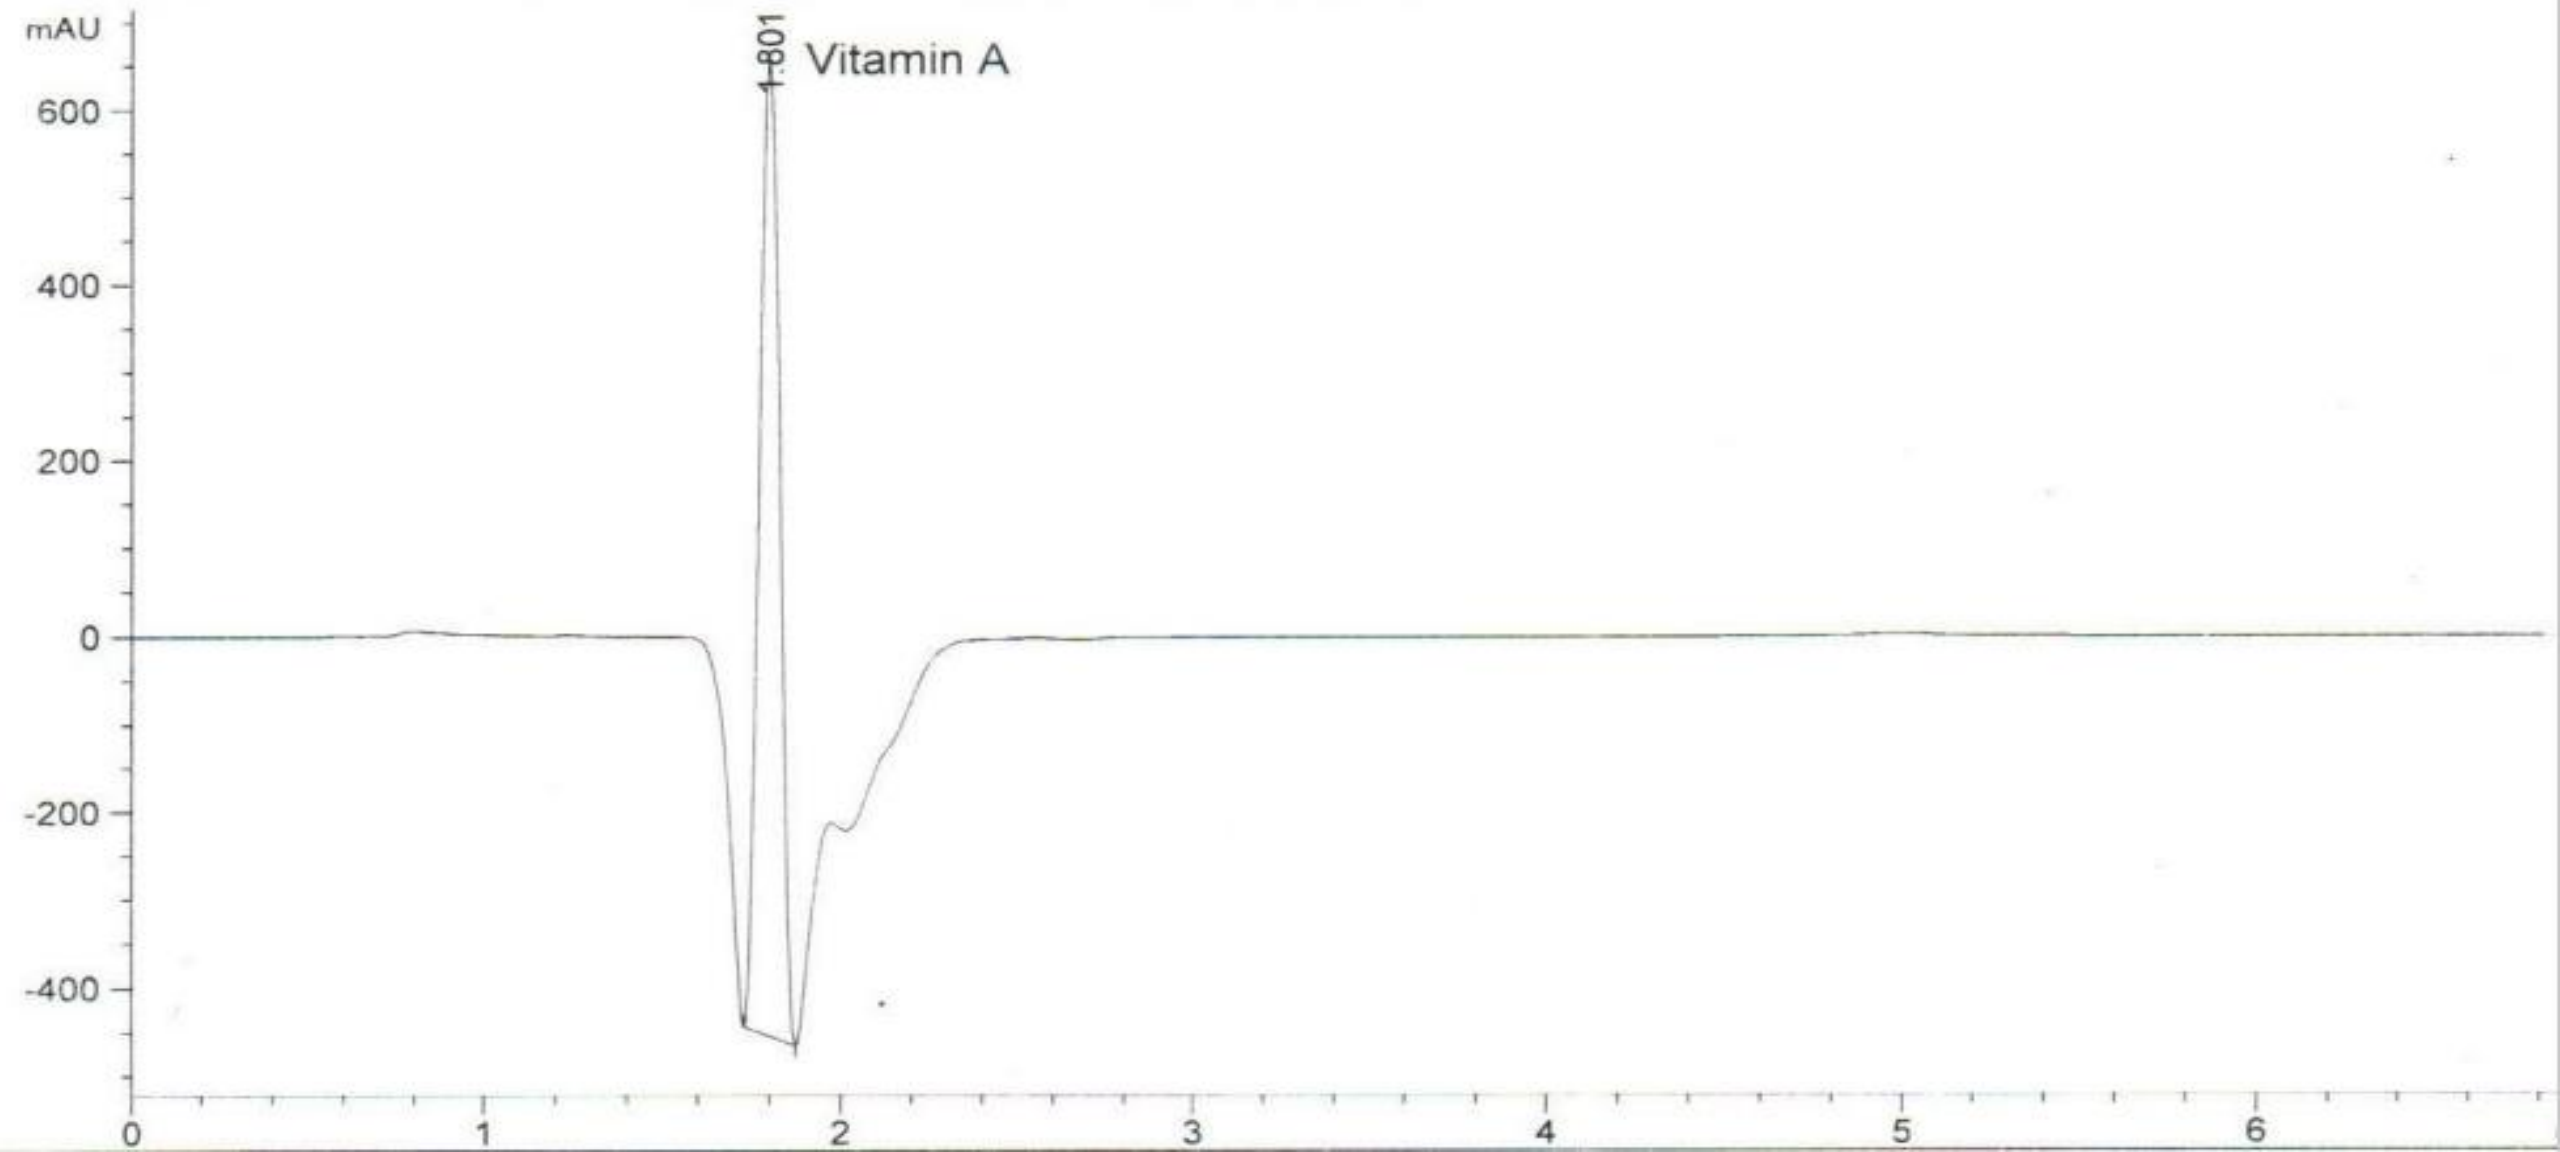

Figure S4: Chromatogram for the HPLC vitamin A standard analysis

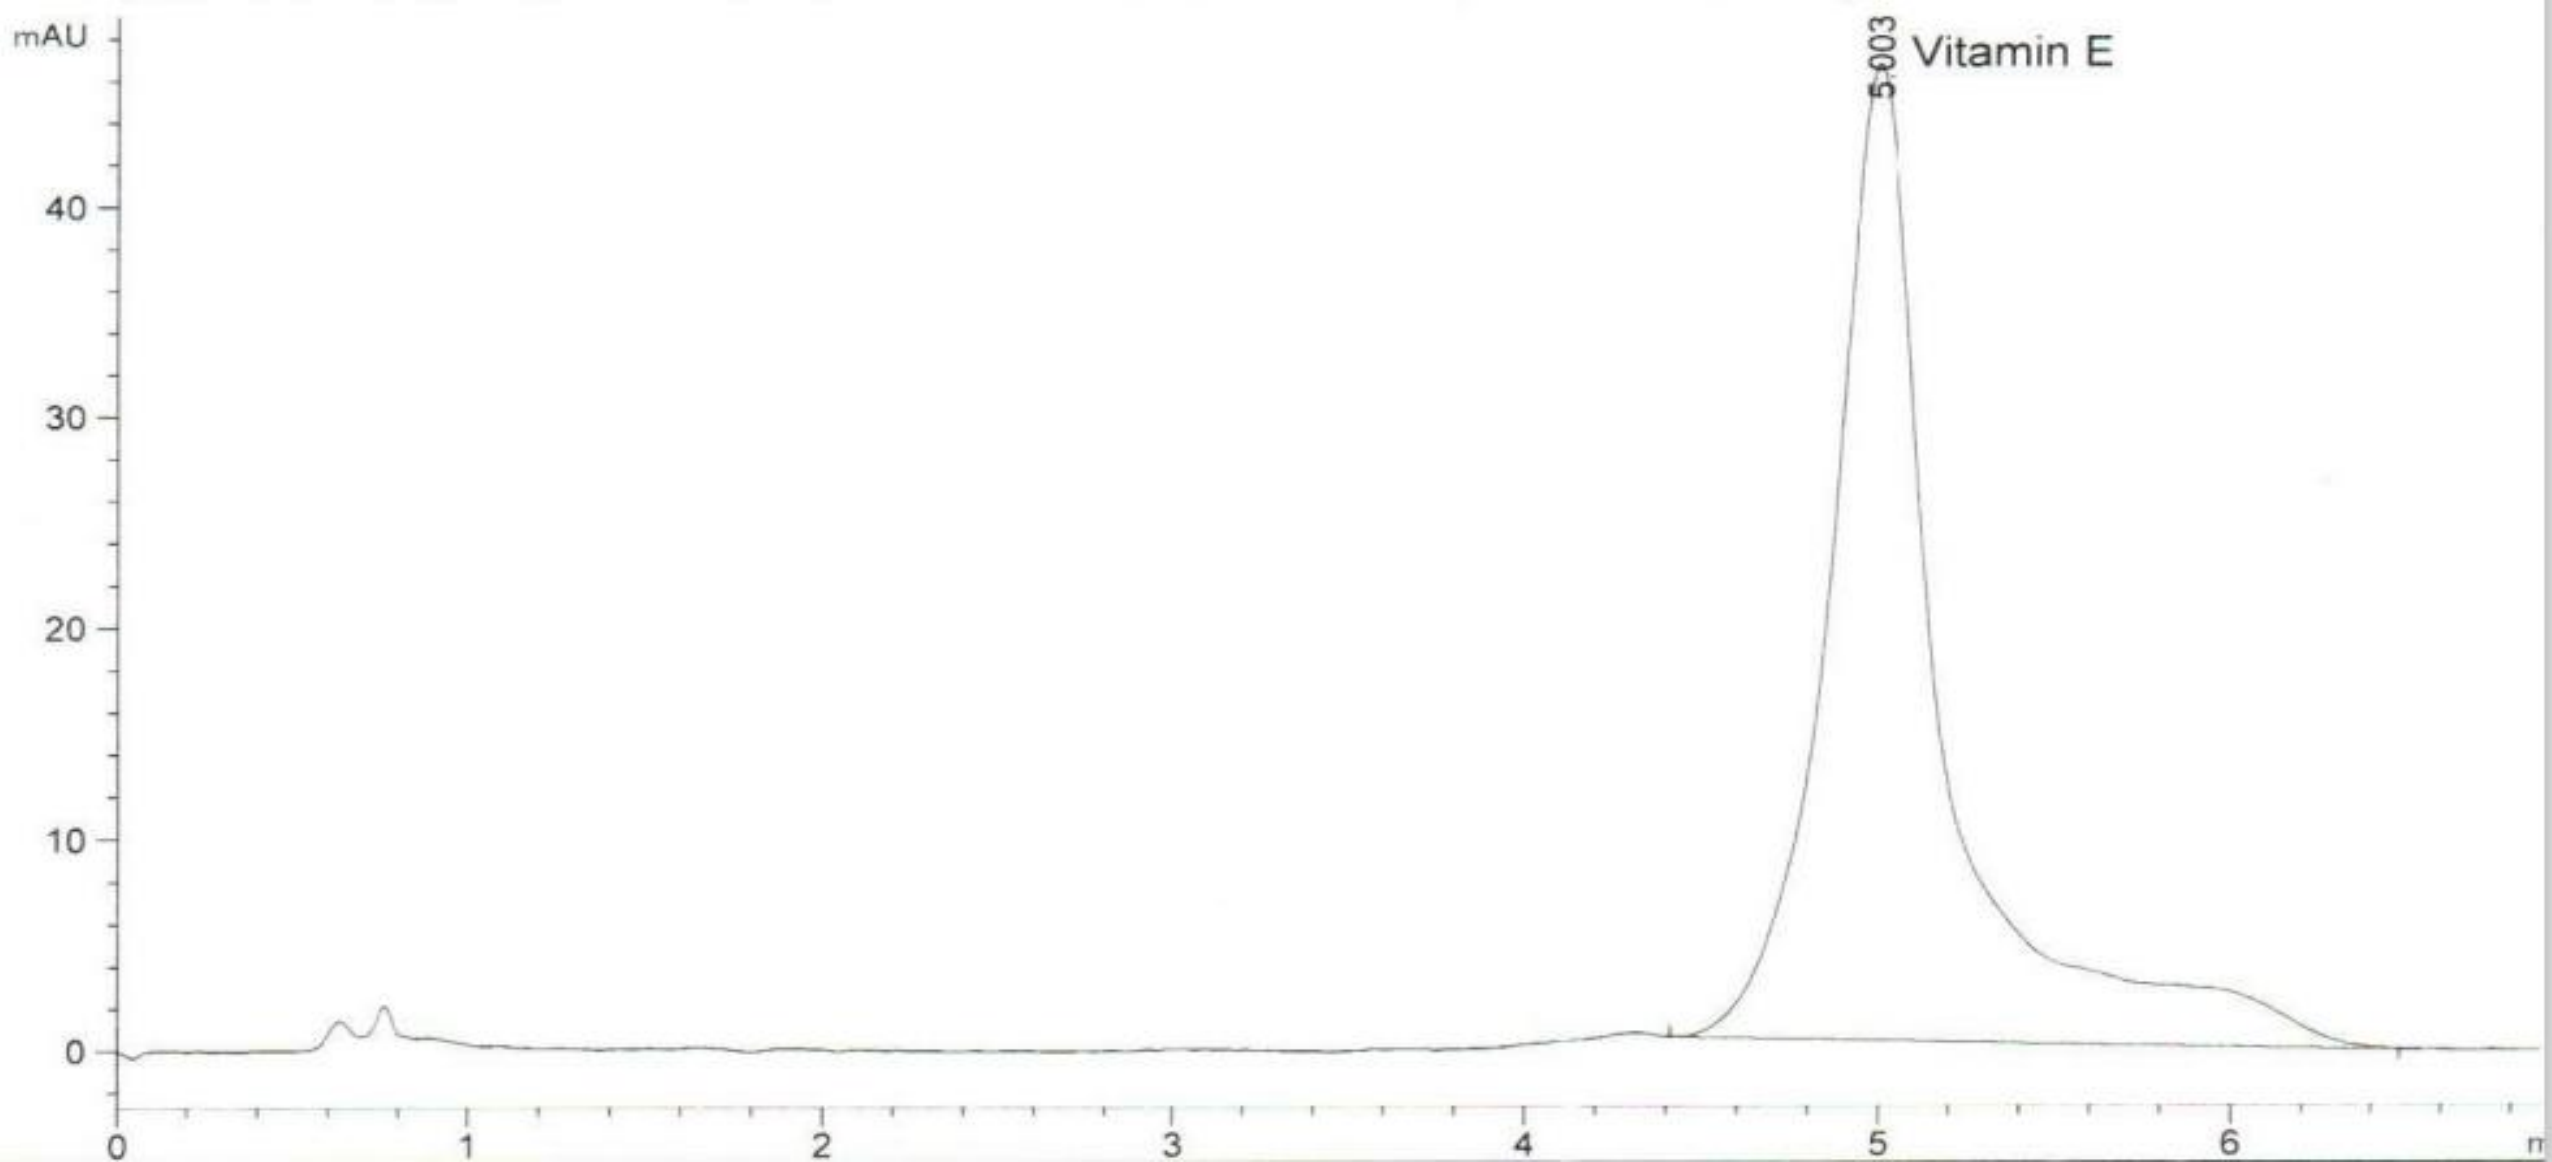

Figure S5: Chromatogram for the HPLC vitamin E standard analysis

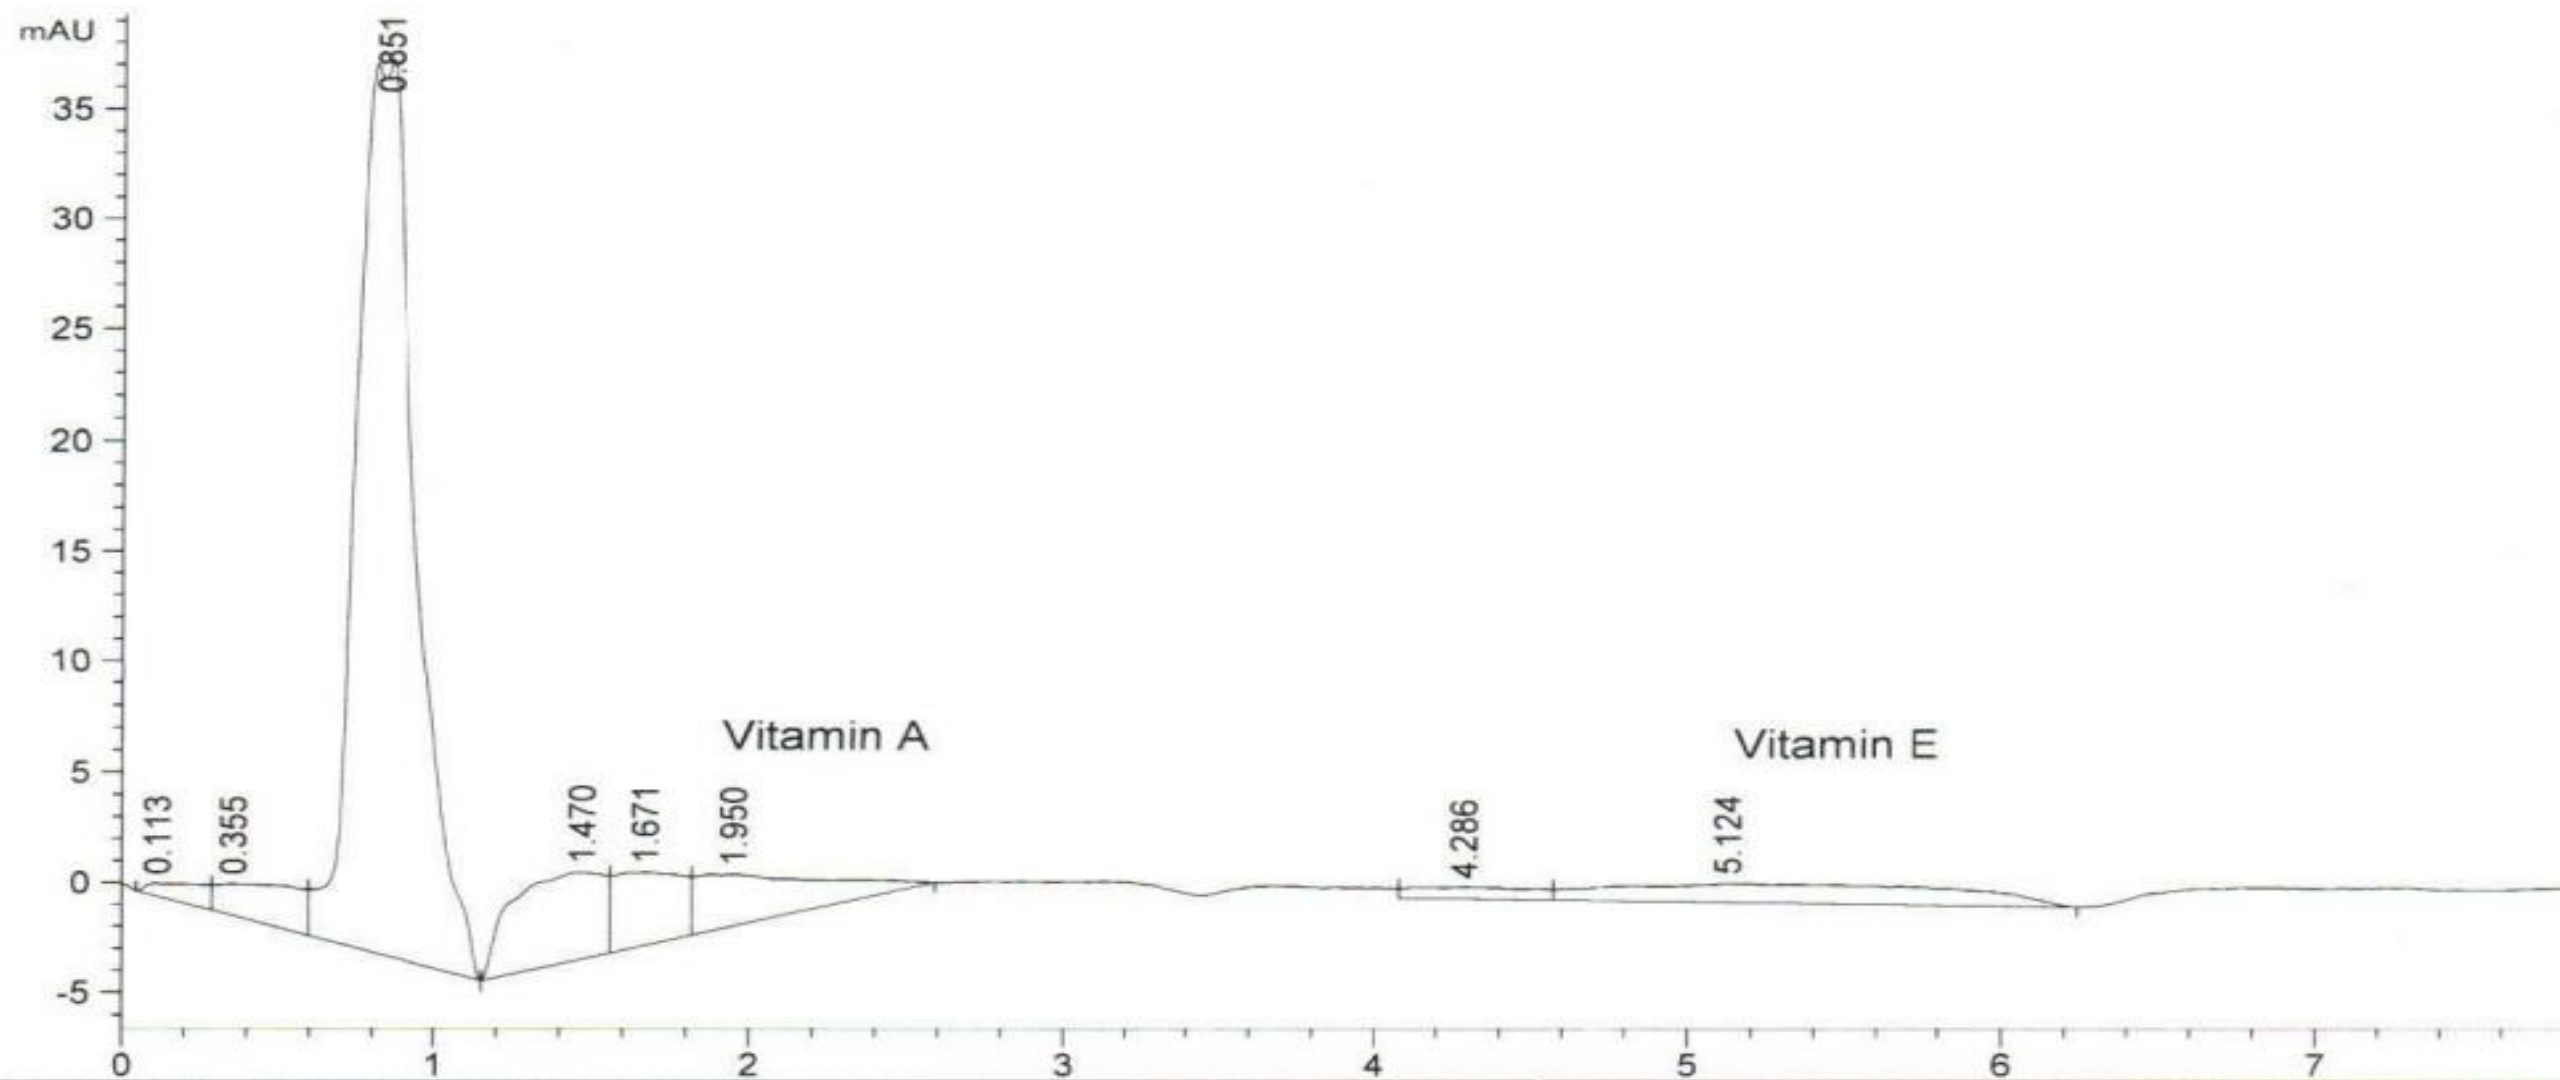

Figure S6: Chromatogram for the HPLC vitamin A and E analysis of the aqueous extract of unfermented *S. monostachyus* leaves

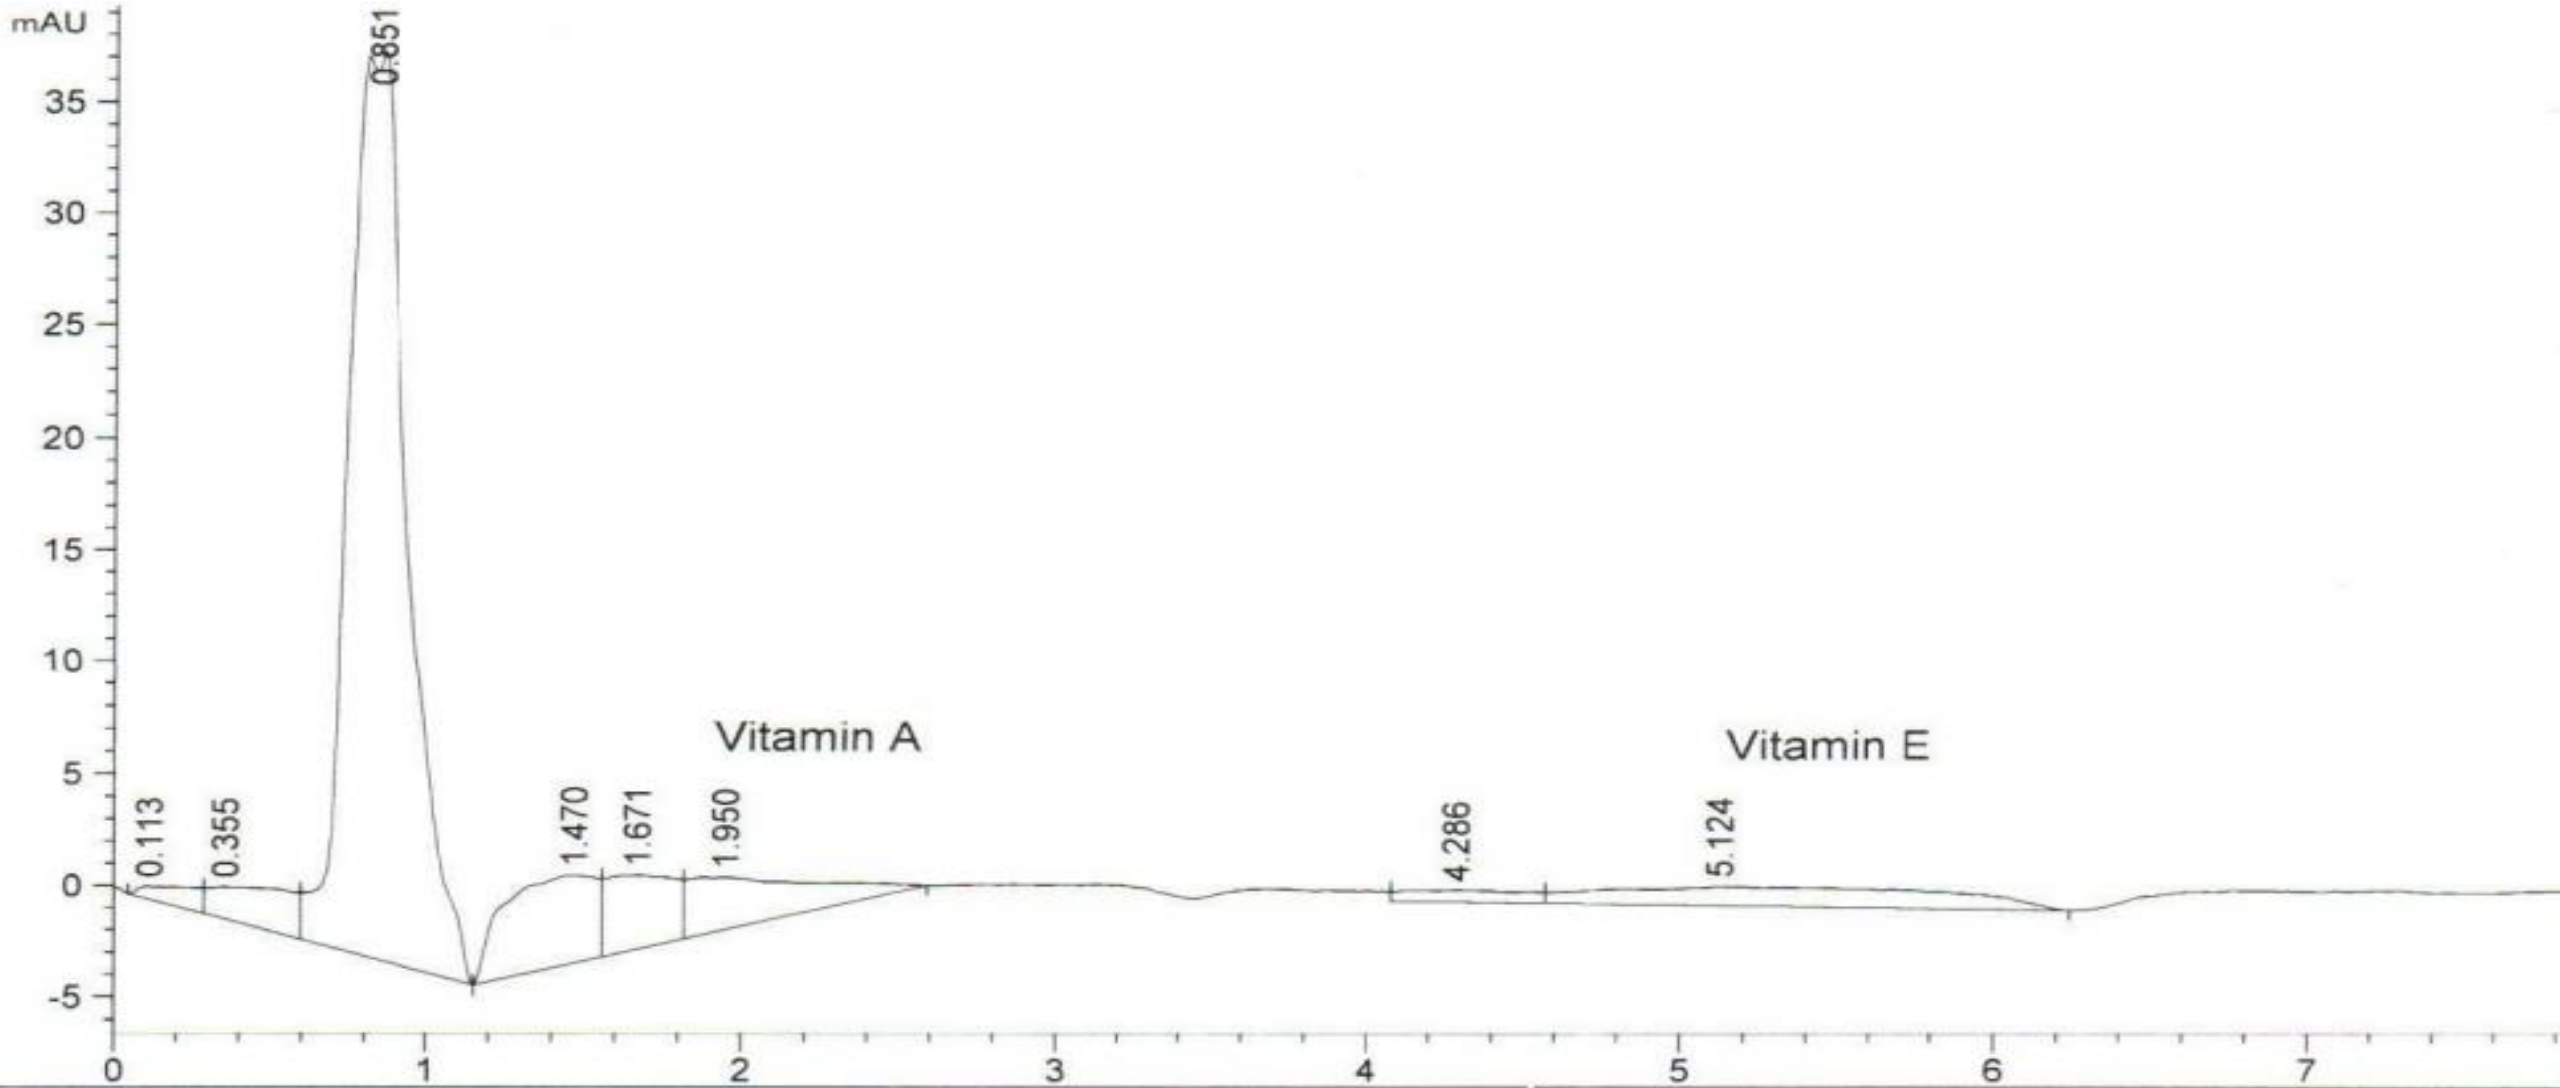

Figure S7: Chromatogram for the HPLC vitamin A and E analysis of the aqueous extract of 5-days fermented *S. monostachyus* leaves

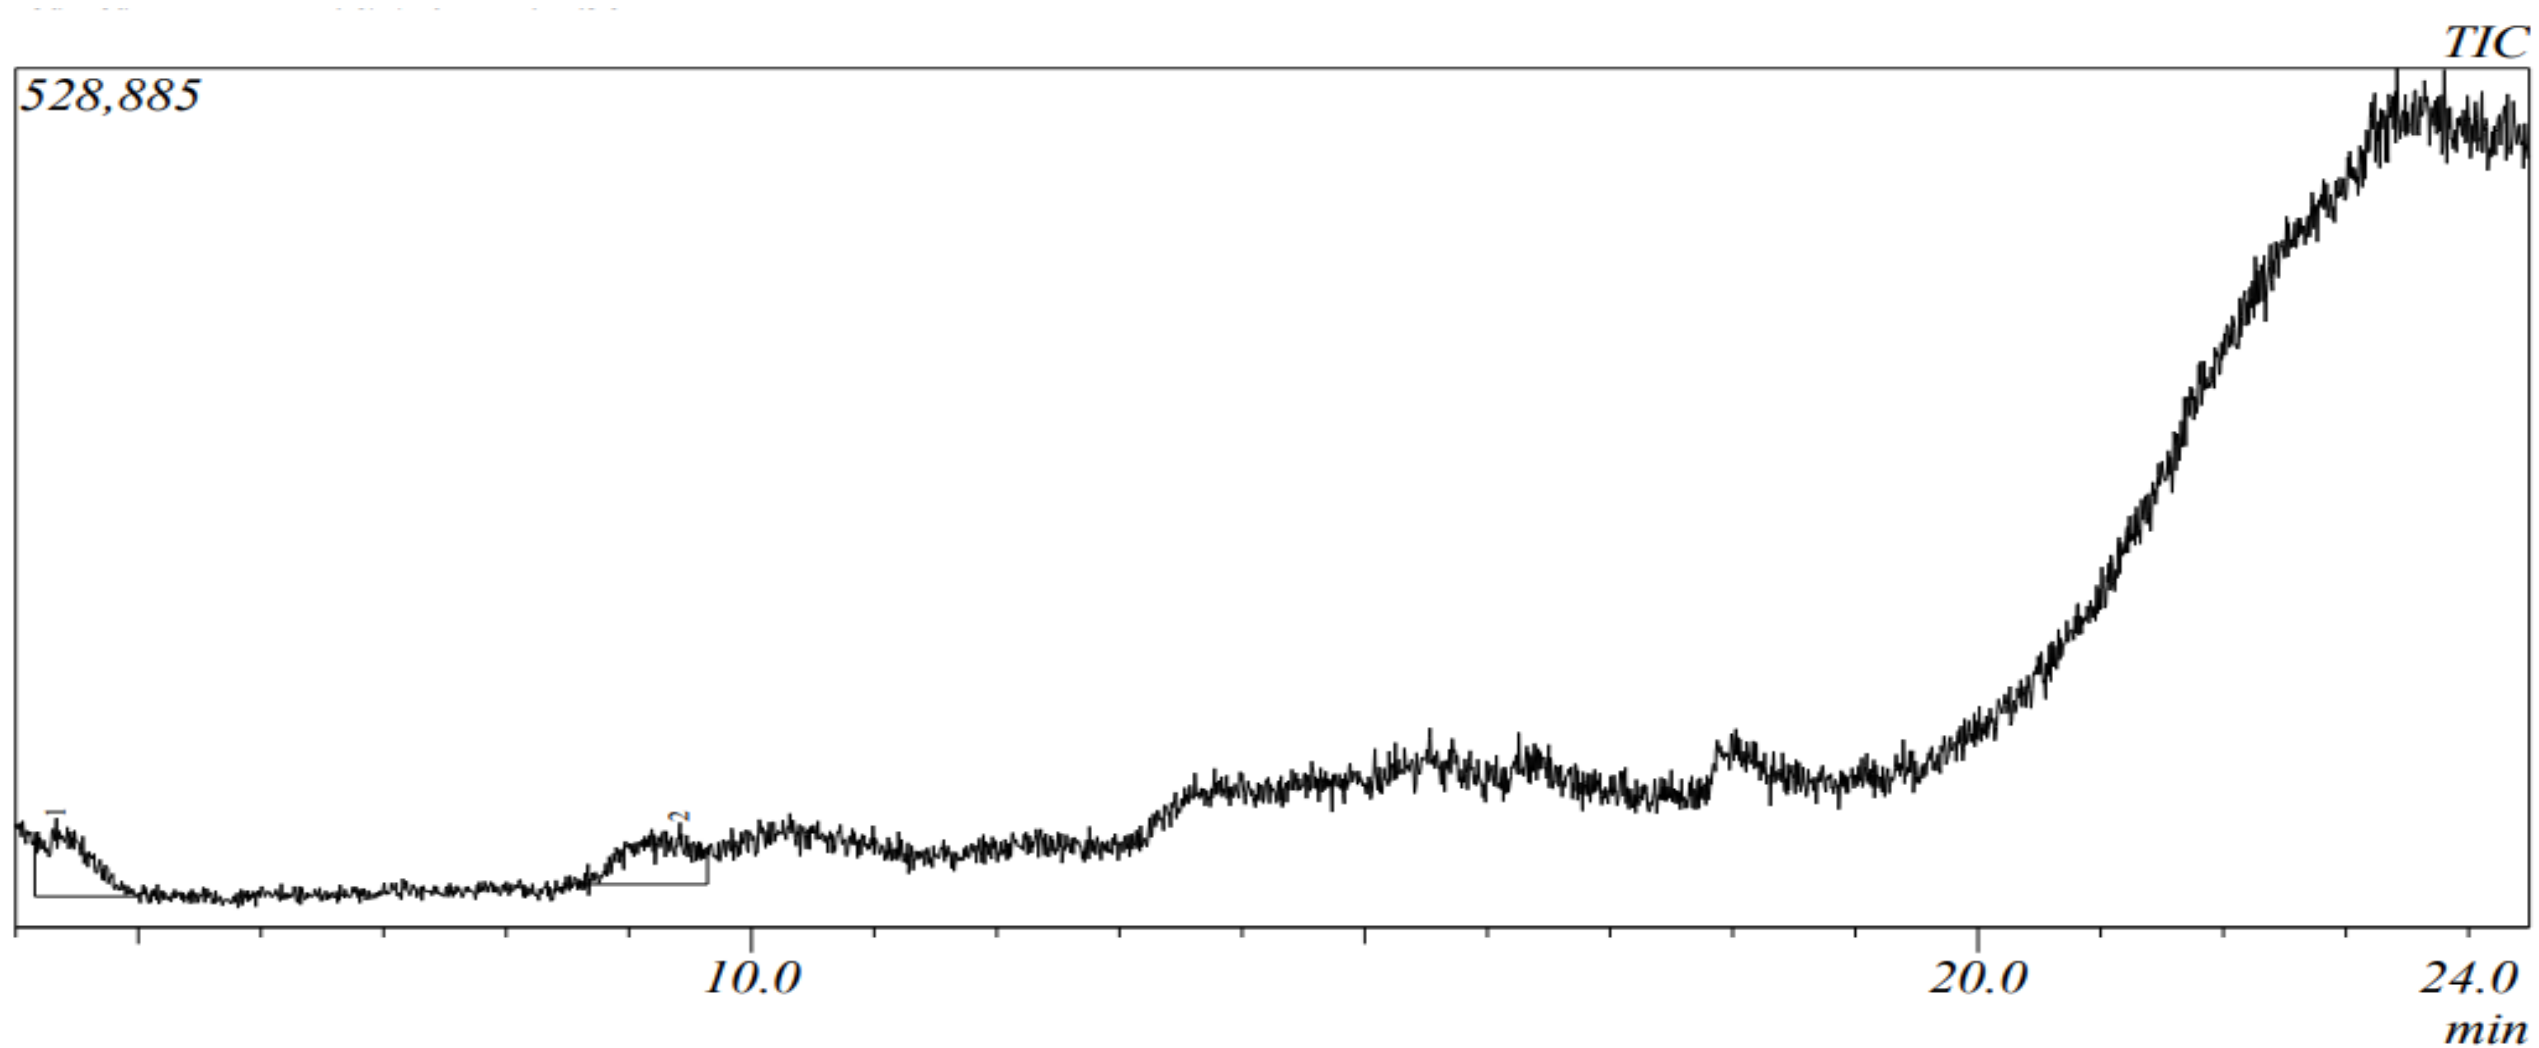

Figure S8: Chromatogram for the GC/MS phytochemical analysis of the aqueous extract of unfermented *S. monostachyus* leaves

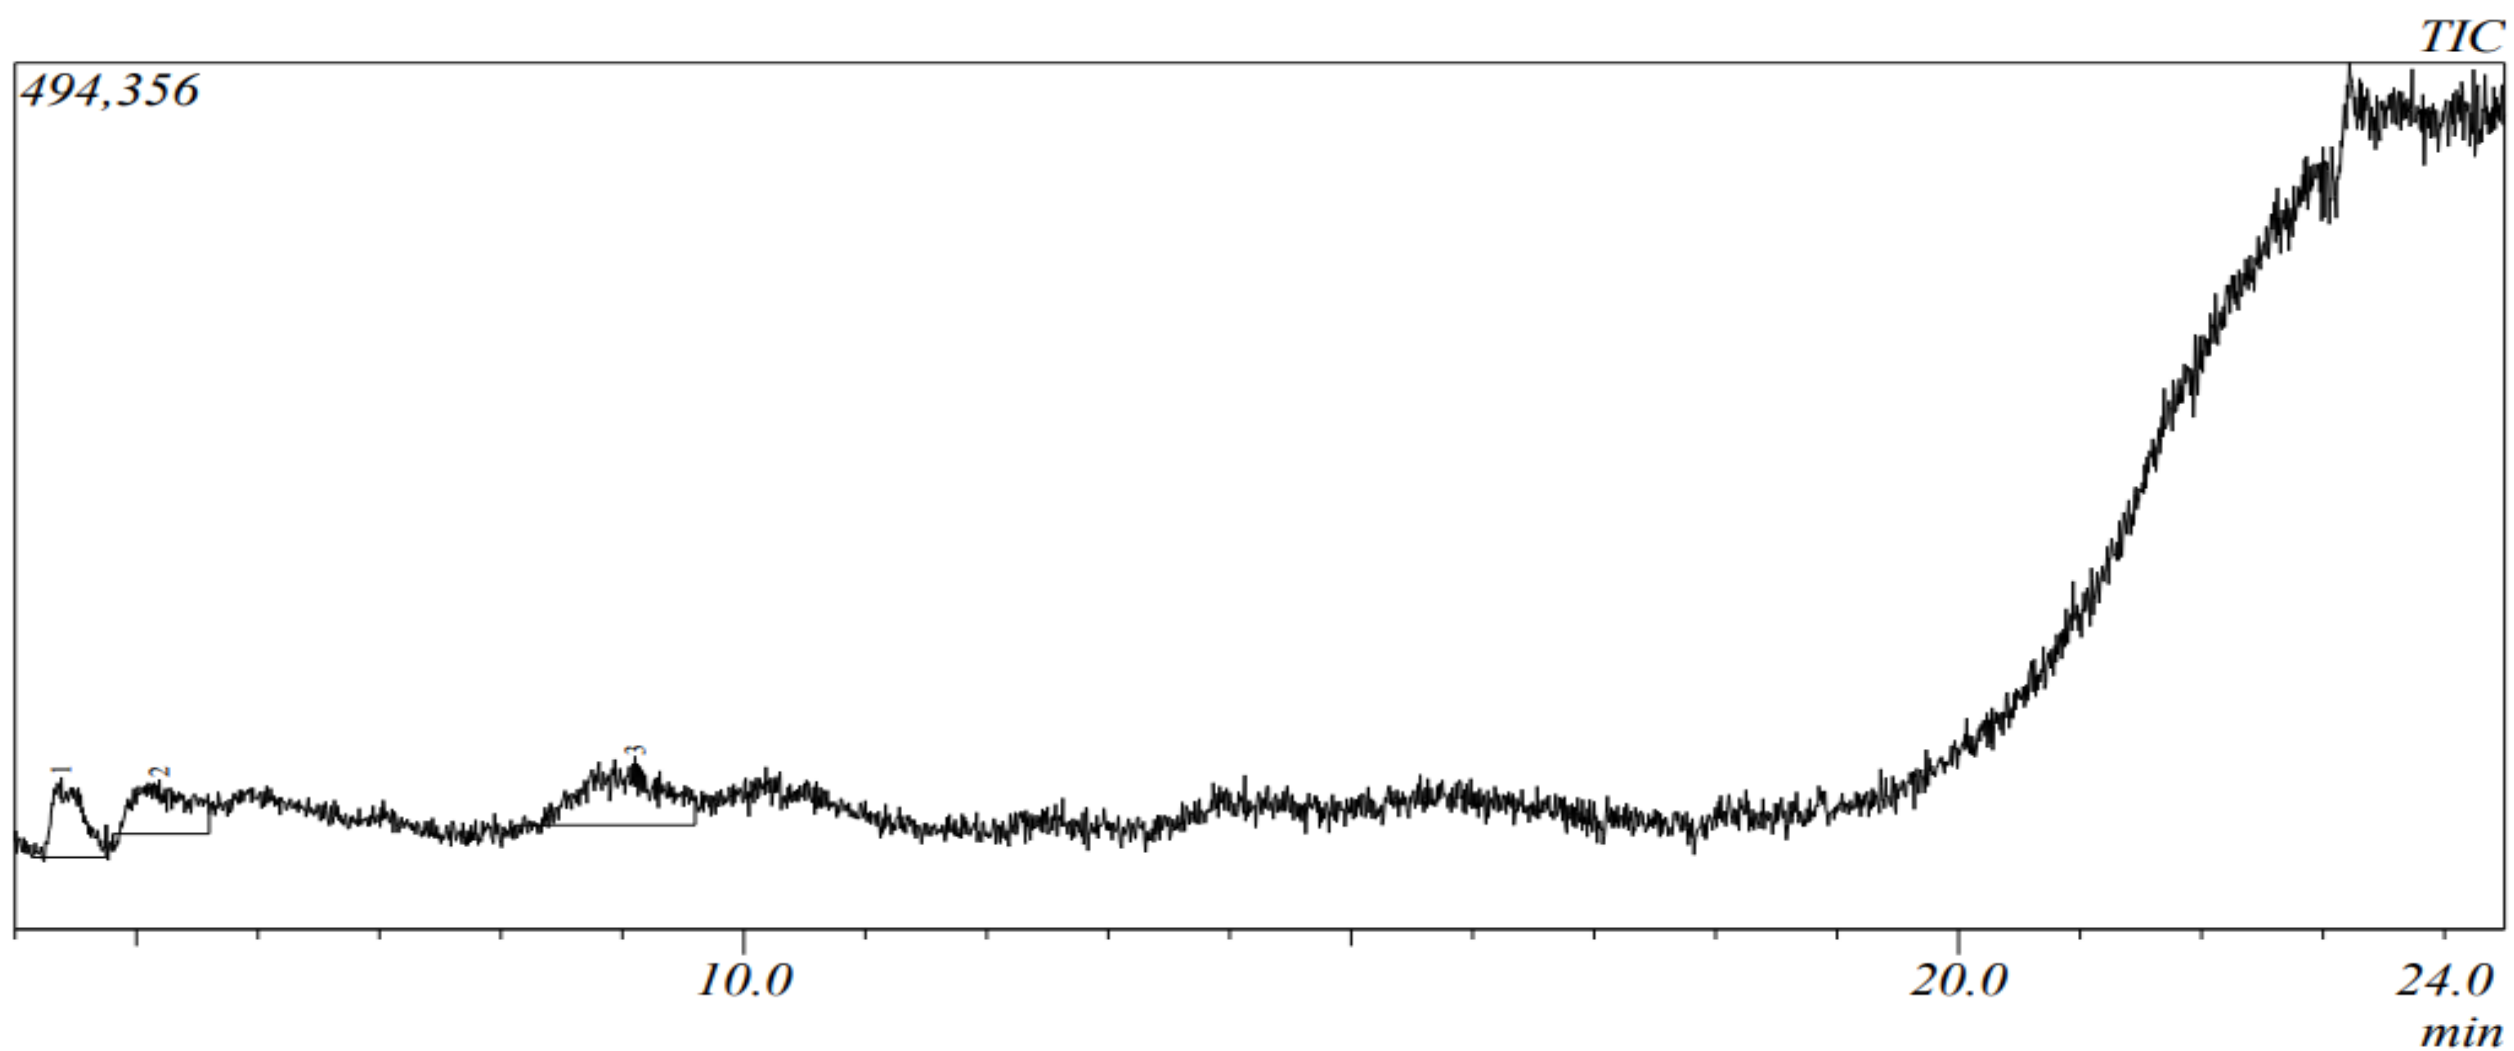

Figure S9: Chromatogram for the GC/MS phytochemical analysis of the aqueous extract of 3-days fermented *S. monostachyus* leaves

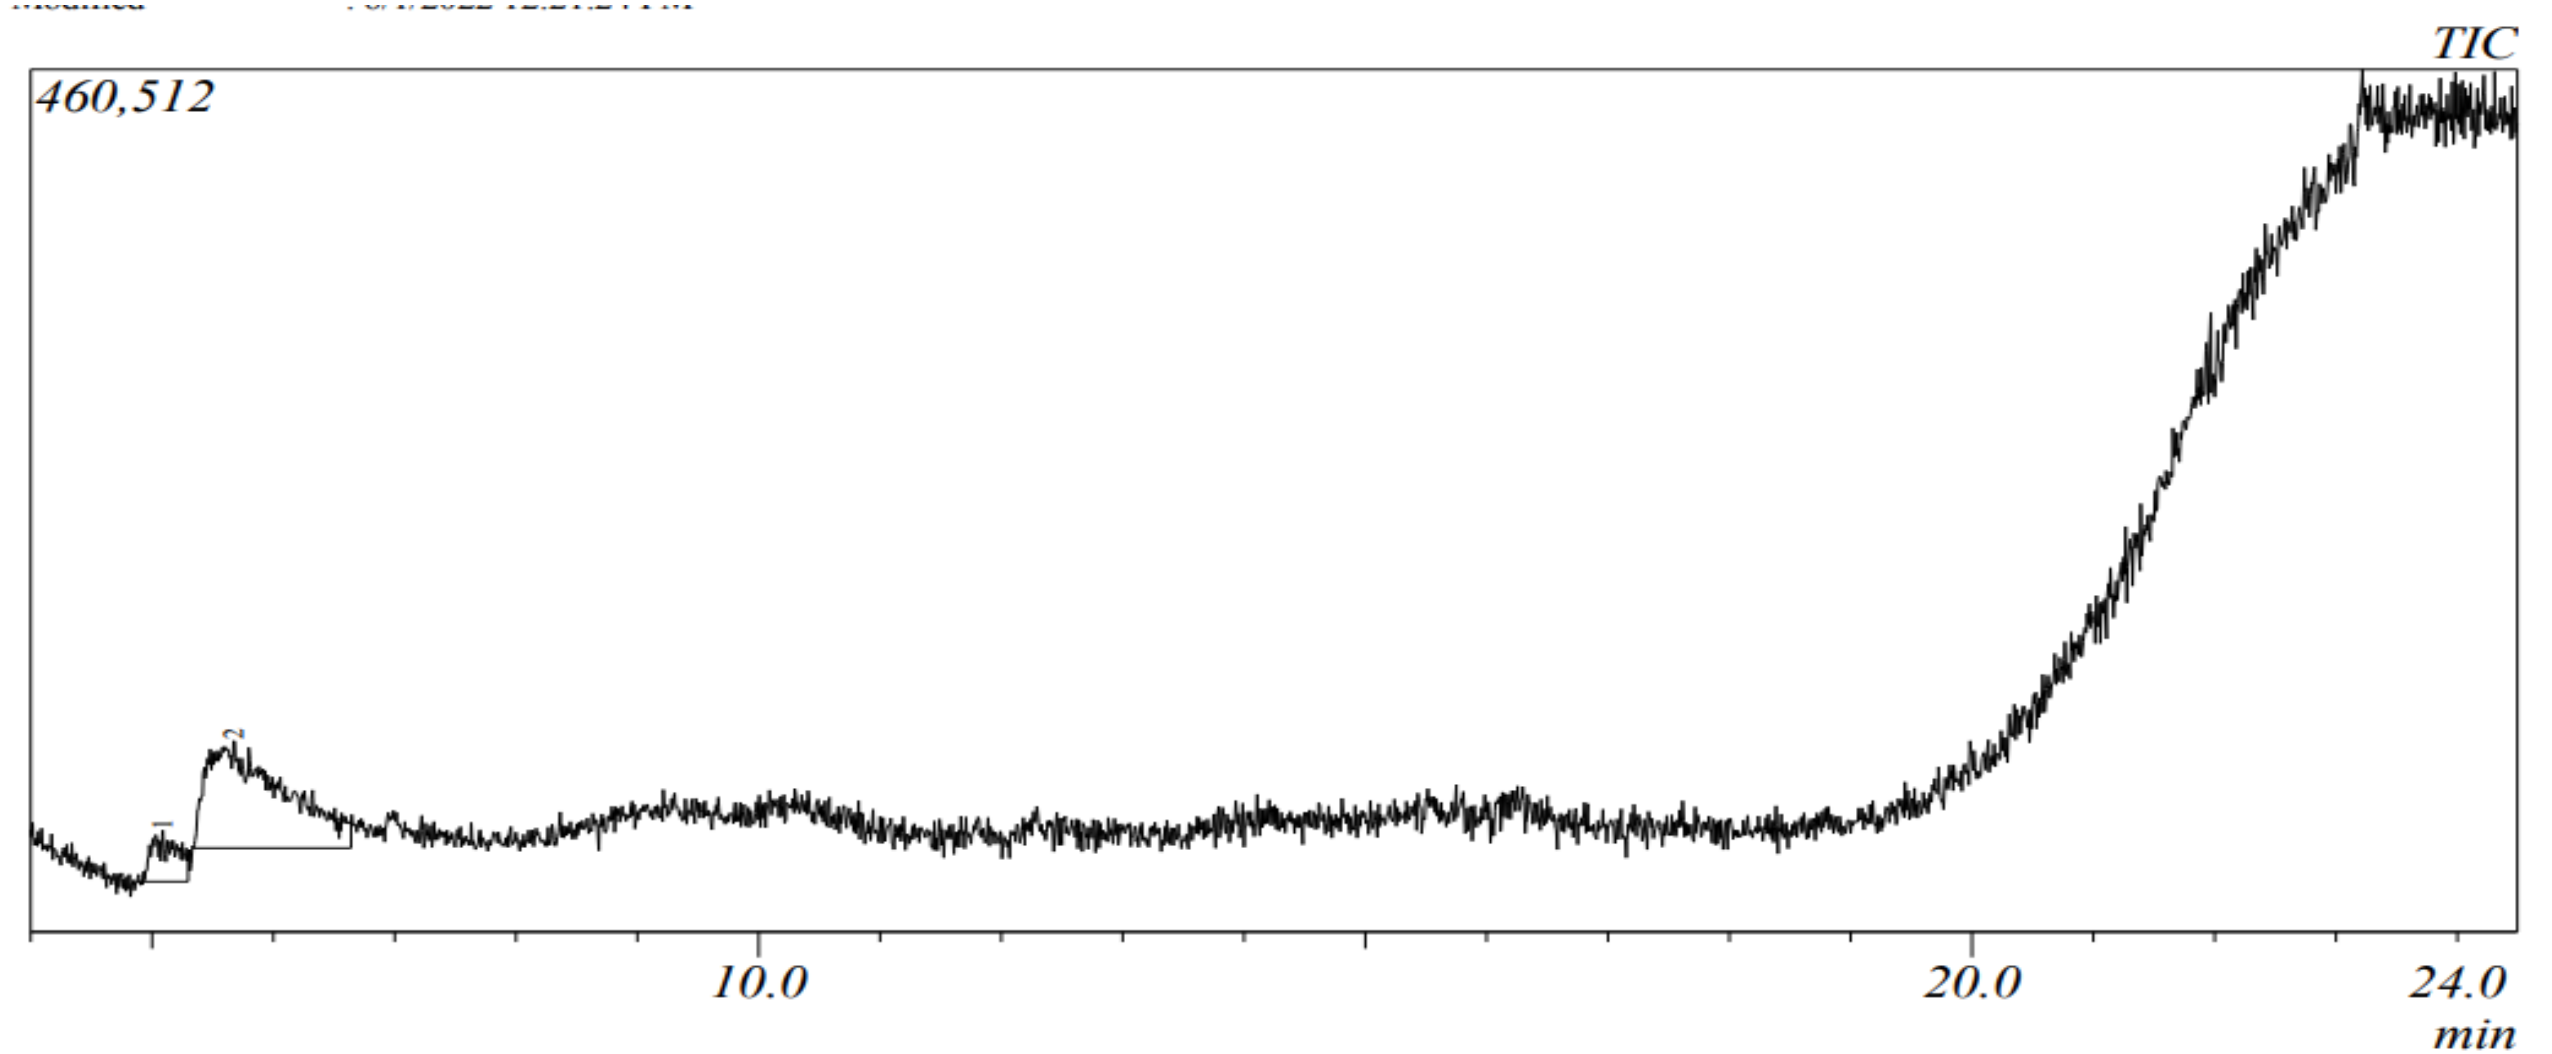

Figure S10: Chromatogram for the GC/MS phytochemical analysis of the aqueous extract of 5-days fermented *S. monostachyus* leaves
